# Supplementary material for: Repositionable Versus Balloon‐Expandable Devices for Transcatheter Aortic Valve Implantation in Patients With Aortic Stenosis
Source: PubMed Central journal article supplement — J Am Heart Assoc. 2016 Nov 17;5(11):e004088. doi: 10.1161/JAHA.116.004088 (PMC5210340; doi:10.1161/jaha.116.004088), 2016-11-17
Supplement: JAH3-5-e004088-s001.pdf [file JAH3-5-e004088-s001.pdf]

# **SUPPLEMENTAL MATERIAL**

Table S1

## Missing Baseline Characteristics, Multiple imputation and Adjusted Analyses

|                                                    | Nr of missing values | Imputed | Used to impute*** | Used for Adjusted Cox's Regression |
|----------------------------------------------------|----------------------|---------|-------------------|------------------------------------|
| Nr of patients                                     | N = 955              |         |                   |                                    |
| Age                                                | 0 (0.0%)             | No      | Yes               | Yes                                |
| Sex                                                | 0 (0.0%)             | No      | Yes               | No                                 |
| Body mass index                                    | 3 (0.3%)             | Yes     | Yes               | No                                 |
| <b>Cardiac Risk Factors</b>                        |                      |         |                   |                                    |
| Diabetes mellitus                                  | 0 (0.0%)             | No      | Yes               | No                                 |
| Dyslipidemia                                       | 0 (0.0%)             | No      | Yes               | Yes                                |
| Hypertension                                       | 1 (0.1%)             | Yes**   | Yes               | No                                 |
| <b>Past Medical History</b>                        |                      |         |                   |                                    |
| Previous pacemaker implantation                    | 0 (0.0%)             | No      | Yes               | No                                 |
| Previous myocardial infarction                     | 0 (0.0%)             | No      | Yes               | No                                 |
| Previous cardiac surgery                           | 0 (0.0%)             | No      | Yes               | No                                 |
| Previous cerebrovascular accident                  | 0 (0.0%)             | No      | Yes               | No                                 |
| <b>Clinical Features</b>                           |                      |         |                   |                                    |
| Peripheral vascular disease                        | 1 (0.1%)             | Yes**   | Yes               | Yes                                |
| Chronic obstructive pulmonary disease              | 1 (0.1%)             | Yes**   | Yes               | No                                 |
| Coronary artery disease                            | 0 (0.0%)             | No      | Yes               | No                                 |
| Aortic Valve Area (cm <sup>2</sup> )               | 241 (25.2%)          | Yes     | Yes               | Yes                                |
| Mean transaortic gradient                          | 104 (10.9%)          | Yes     | Yes               | No                                 |
| Aortic regurgitation grade moderate or severe      | 65 (6.8%)            | Yes     | Yes               | Yes                                |
| Mitral regurgitation grade moderate or severe      | 50 (5.2%)            | Yes     | Yes               | No                                 |
| <b>Symptoms on admission</b>                       |                      |         |                   |                                    |
| New York Heart Association (NYHA) Functional Class | 48 (5.0%)            | Yes     | Yes               | Yes                                |
| Canadian Cardiovascular Society Angina Class       | 4 (0.4%)             | Yes     | Yes               | No                                 |

|                        |           |     |     |     |
|------------------------|-----------|-----|-----|-----|
| <b>Risk Assessment</b> |           |     |     |     |
| STS Score              | 22 (2.3%) | Yes | Yes | Yes |
| <b>Device</b>          |           |     |     |     |
| Device size            | 0 (0.0%)  | No  | Yes | No  |
| <b>Primary Outcome</b> |           |     |     |     |
| Early Safety Endpoint  | 0 (0.0%)  | No  | Yes | No  |

\*\* Single imputation with the mode. All other missing values were multiple imputed.

\*\*\* Chained equations.

## **Collaborators and Swiss TAVI Investigators:**

### **University Hospital Basel**

Department of Cardiology: Raban Jeger, MD; Christoph Kaiser, MD

Department of Cardiothoracic Surgery: Oliver Reuthebuch, MD

### **University Hospital Bern**

Department of Cardiology: Stefan Stortecky, MD; Stephan Windecker, MD; André Frenk, PhD

Department of Cardiothoracic Surgery: Eva Roost, MD; Thierry Carrel, MD

Department of Clinical Research and Clinical Trials Unit, University of Bern: Peter Jüni, MD; Dik Heg, PhD; Alan Haynes, PhD

### **University Hospital Geneva**

Department of Cardiology: Marco Roffi, MD; Stephane Noble, MD

Department of Cardiothoracic Surgery: Christoph Huber, MD

### **University Hospital Lausanne**

Department of Cardiology: Olivier Muller, MD; Eric Eeckhout, MD

### **Cantonal Hospital Lucerne**

Department of Cardiology: Stefan Toggweiler, MD

Department of Cardiothoracic Surgery: Xavier Mueller, MD

### **Cardiocentro Ticino, Lugano**

Department of Cardiology: Giovanni Pedrazzini, MD

Department of Cardiothoracic Surgery: Enrico Ferrari, MD

### **Triemli Hospital Zurich**

Department of Cardiology: David Tüller, MD; Franz Eberli, MD

Department of Cardiothoracic Surgery: Michele Genoni, MD; Omer Dzemali, MD

### **Hirslanden Klinik im Park Zurich**

Department of Cardiology: Peter Wenaweser, MD; Franz W. Amann, MD

Department of Cardiothoracic Surgery: Pascal A. Berdat, MD

### **Hirslanden Cardiac Centre Zurich**

Department of Cardiology: Gabor Sütsch, MD

Department of Cardiothoracic Surgery: Franziska Bernet, MD

### **Heart Clinic Hirslanden Zurich**

Department of Cardiology: Roberto Corti, MD

Department of Cardiothoracic Surgery: Jürg Grünenfelder, MD

**Hirslanden Clinic Beau – Site Bern**

Department of Cardiology: Urs Kaufmann, MD

**Hirslanden Clinic Cecil Lausanne**

Department of Cardiology: Stéphane Cook, MD; Jean-Jacques Goy, MD; Mario Togni, MD

**Hirslanden Clinic Aarau**

Department of Cardiothoracic Surgery: Lars Englberger, MD; Fabian Gisler MD; Bettina Langhammer, MD

**Cantonal Hospital Aarau**

Department of Cardiology: André Vuilliomenet, MD; Igal Moarof, MD

**Hôpital de La Tour Geneva**

Department of Cardiology: Edoardo de Benedetti, MD; Amir Fassa, MD

**University Hospital Zurich**

Department of Cardiology: Fabian Nietlispach, MD; Ronald Binder, MD

Department of Cardiothoracic Surgery: Francesco Maisano, MD; Maurizio Taramasso, MD

**St Clara's Hospital Basel**

Department of Cardiology: Lukas Altwegg, MD (prior member of the SC)
